# Supplementary material
Source: PubMed Central journal article supplement (PMC6724705)
Supplement: NIHMS1523080-supplement-1.pdf [file NIHMS1523080-supplement-1.pdf]

## Inventory of Supplemental Information

**Supplemental Information.pdf** This file contains Figures S1 to S8.
